# Supplementary material
Source: MDPI journal article supplement (https://www.mdpi.com/2073-4433/14/10/1573)
Supplement: s1 [file s1]

# Supplementary Materials: Are Near-Coastal Sea Levels Accelerating Faster than Global during the Satellite Altimetry Era?

Ying Qu <sup>1</sup>, Svetlana Jevrejeva <sup>2,\*</sup> and Hindumathi Palanisamy <sup>3</sup>

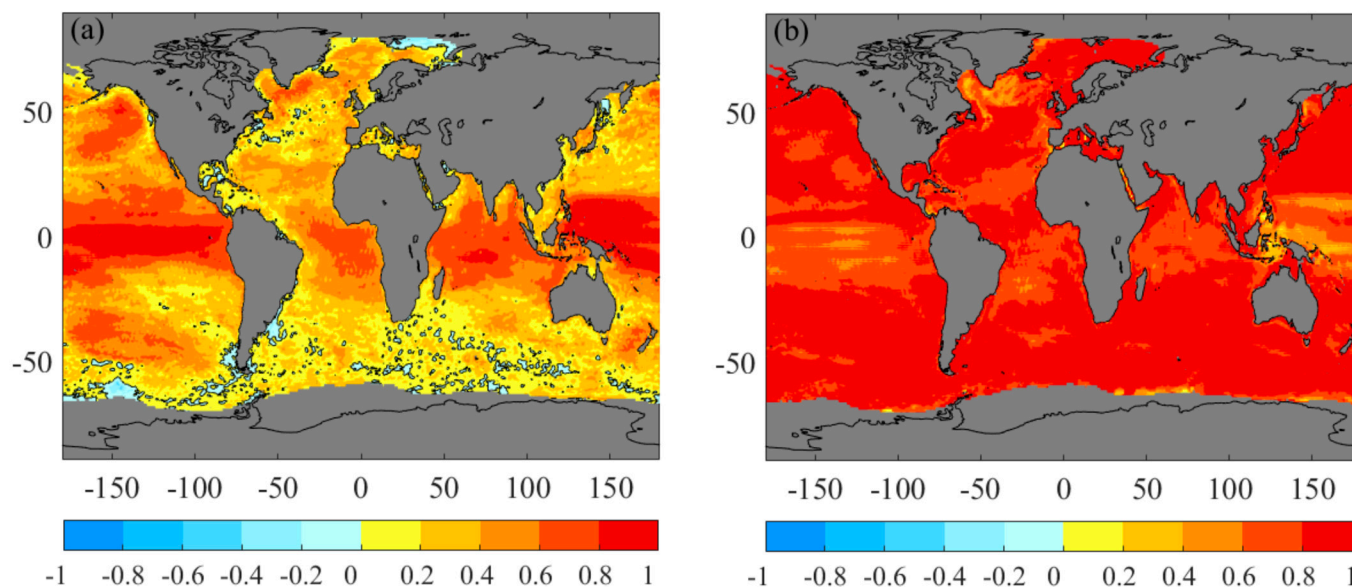

**Figure S1.** Map of correlation coefficients between altimetry and IAP steric for 1993-2020 (a) and correlation coefficients between altimetry and the difference for 1993-2020 (b).

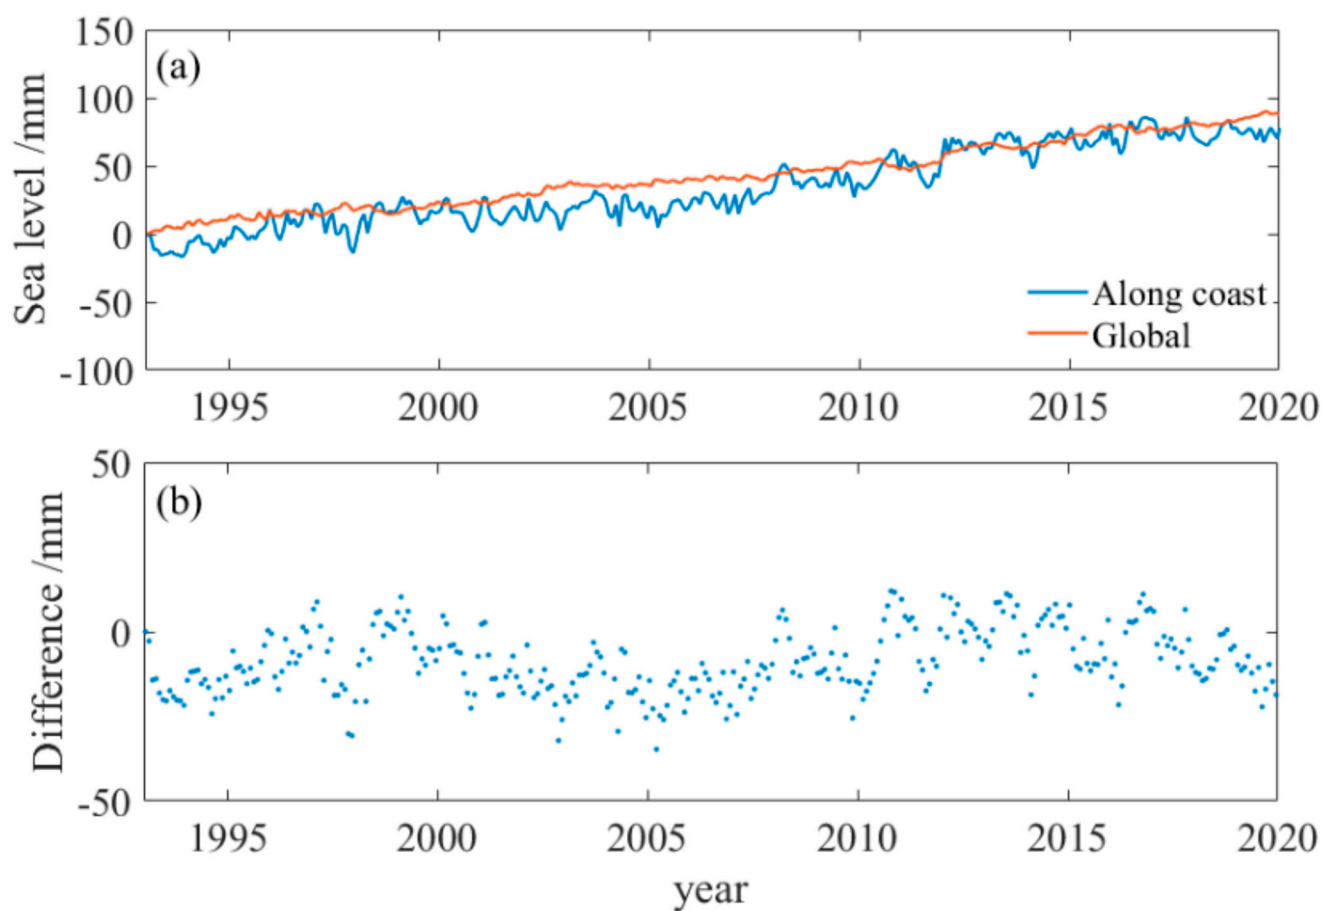

**Figure S2.** Panel a. Global mean sea level time series 1993–2020 are represented by the red line, and global near coastal mean sea level (1993–2020) is represented by blue colour. Global near coastal mean sea level is calculated from satellite altimetry values close to the coastline. Panel b. The difference between global near coastal sea level and global mean sea level is represented by blue dots.

**Table S1.** Estimates of trend (mm·yr<sup>-1</sup>) and acceleration (mm·yr<sup>-2</sup>) for global near coastal and global mean sea levels.

|                                     | Satellite altimetry |             | Satellite altimetry* |             |
|-------------------------------------|---------------------|-------------|----------------------|-------------|
|                                     | global near coastal | global      | global near coastal  | global      |
| Trend (mm·yr <sup>-1</sup> )        | 3.5 ± 0.3           | 3.1 ± 0.3   | 3.6 ± 0.3            | 3.2 ± 0.1   |
| Acceleration (mm·yr <sup>-2</sup> ) | 0.10 ± 0.03         | 0.07 ± 0.01 | 0.09 ± 0.03          | 0.04 ± 0.01 |

\*Corrected for ENSO and PDO effects.
